# Supplementary material
Source: PubMed Central journal article supplement (PMC3190206)
Supplement: supp_nsq079_Tables.pdf [file supp_nsq079_Tables.pdf]

**TABLES**

**Table S1. Neuroimaging Results**

| CONTRAST & BRAIN REGION                                           | BA | Coordinates |     |    |
|-------------------------------------------------------------------|----|-------------|-----|----|
|                                                                   |    | x           | y   | z  |
| <b>A) Factor Aggression</b>                                       |    |             |     |    |
| Left middle frontal gyrus (left lateral orbitofrontal cortex)     | 47 | -42         | 35  | 1  |
| Right inferior frontal gyrus (right lateral orbitofrontal cortex) | 45 | 42          | 23  | 4  |
| Rostral anterior cingulate cortex                                 | 32 | 0           | 44  | 7  |
| Left inferior frontal gyrus                                       | 9  | -45         | 8   | 28 |
| Right precentral gyrus                                            | 9  | 39          | 11  | 31 |
| Left superior frontal gyrus                                       | 6  | 0           | 20  | 55 |
| Right anterior cingulate cortex (right subgenual)                 | 25 | 3           | 2   | -8 |
| Left cingulate gyrus (left middle cingulate cortex)               | 24 | -3          | -4  | 34 |
| Left middle frontal gyrus                                         | 6  | -24         | -1  | 61 |
| Right frontal lobe (right subgyral)                               | 6  | 21          | -7  | 52 |
| Right posterior cingulate cortex                                  | 23 | 3           | -43 | 22 |
| Right cingulate gyrus                                             | 31 | 3           | -58 | 25 |
| Left cingulate gyrus                                              | 23 | -3          | -19 | 28 |
| Left middle temporal gyrus                                        | 39 | -48         | -55 | 10 |
| Right middle temporal gyrus                                       | 37 | 45          | -61 | 4  |
| Left middle occipital gyrus                                       | 19 | -30         | -79 | 16 |

|                               |     |     |     |     |
|-------------------------------|-----|-----|-----|-----|
| Right middle occipital gyrus  | 19  | 36  | -79 | 16  |
| Right superior temporal gyrus | 22  | 54  | -52 | 16  |
| Left cuneus                   | 17  | -9  | -91 | 2   |
| Right cuneus                  | 17  | 12  | -85 | 7   |
| Right cerebellum (culmen)     | N/A | 27  | -46 | -11 |
| Right left fusiform gyrus     | 37  | -30 | -46 | -10 |

***B) Factor Time***

|                                 |     |     |     |     |
|---------------------------------|-----|-----|-----|-----|
| Left middle frontal gyrus       | 10  | -27 | 44  | 13  |
| Right middle frontal gyrus      | 10  | 36  | 44  | 16  |
| Left middle frontal gyrus       | 6   | -21 | -13 | 52  |
| Right middle frontal gyrus      | 6   | 24  | -13 | 55  |
| Left putamen                    | N/A | -27 | -10 | 4   |
| Right putamen                   | N/A | 24  | -10 | 7   |
| Right transverse temporal gyrus | 42  | 60  | -13 | 10  |
| Cingulate gyrus                 | 24  | 0   | 17  | 28  |
| Left cingulate gyrus            | 23  | -3  | -31 | 28  |
| Right precuneus                 | 31  | 6   | -67 | 25  |
| Right lingual gyrus             | 18  | 3   | -70 | 1   |
| Left middle temporal gyrus      | 37  | -42 | -58 | -5  |
| Right fusiform gyrus            | 37  | 30  | -42 | -14 |
| Right angular gyrus             | 39  | 45  | -64 | 34  |

|                    |    |     |     |    |
|--------------------|----|-----|-----|----|
| Left angular gyrus | 39 | -39 | -58 | 33 |
|--------------------|----|-----|-----|----|

**C) Aggression x Time Interaction**

|                                                               |    |     |     |    |
|---------------------------------------------------------------|----|-----|-----|----|
| Left middle frontal gyrus (left lateral orbitofrontal cortex) | 10 | -27 | 47  | -5 |
| Right precuneus                                               | 31 | 3   | -61 | 25 |
| Left intraparietal lobe                                       | 39 | -45 | -64 | 31 |
| Right intraparietal lobe                                      | 7  | 30  | -52 | 43 |

P < 0.05, q(FDR) corrected; minimum cluster threshold = 270 mm<sup>3</sup>; BA, Brodman area.

**Table S2. *P*– values of the path weights for the network shown in Figure 5A**

| <b>BRAIN REGIONS</b> | L IOFC         | Prec           | L IPL          | R IPL          |
|----------------------|----------------|----------------|----------------|----------------|
| L IOFC               | 0              | 0.455 ↑        | <b>0.006</b> ↑ | <b>0.000</b> ↑ |
| Prec                 | 0.819 ↑        | 0              | <b>0.005</b> ↑ | <b>0.018</b> ↑ |
| L IPL                | <b>0.035</b> ↑ | <b>0.005</b> ↑ | 0              | 0.247 ↑        |
| R IPL                | <b>0.038</b> ↑ | <b>0.009</b> ↑ | 0.067 ↑        | 0              |

L IOFC, left lateral orbitofrontal cortex; Prec, precuneus; L IPL, left intraparietal lobule; R IPL, right intraparietal lobule. Note that the path weights for all significant connections are marked in bold. The direction of causal influence is from the columns to the rows. Analogous to positive and negative correlations, the arrows besides each path weight reflect the tendency of the BOLD signal in the two ROIs linked by the path: ‘covarying’ paths (↑) to covary either in the same direction (i.e., both tending to increase or decrease together albeit with a phase difference) or ‘antivarying’ paths (↓) to vary in opposite directions (i.e., one tending to increase when the other one decreases).
