# Supplementary material
Source: PubMed Central journal article supplement (PMC3190206)

Fig. S1

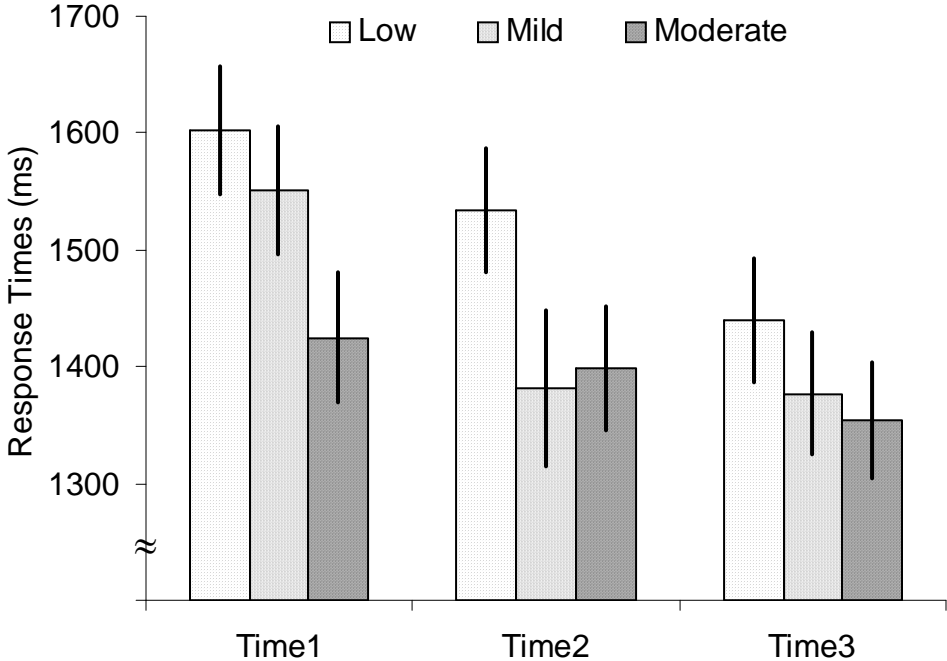

Supplement: supp_nsq079_Fig2_S1.pdf [file supp_nsq079_Fig2_S1.pdf]

Fig. S2

# Main Effect of Aggression

Right

Left

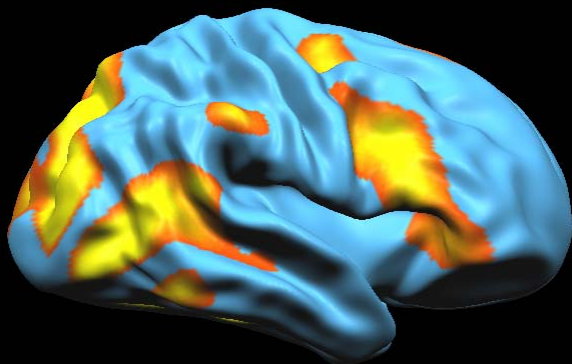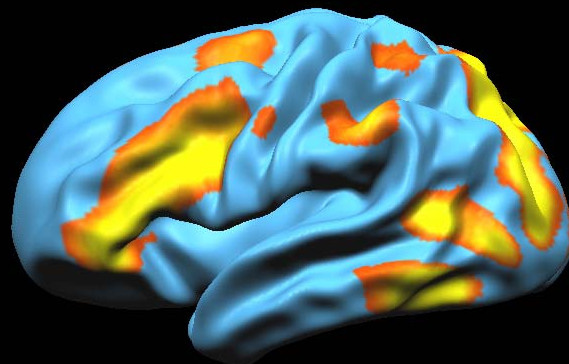

Front

Back

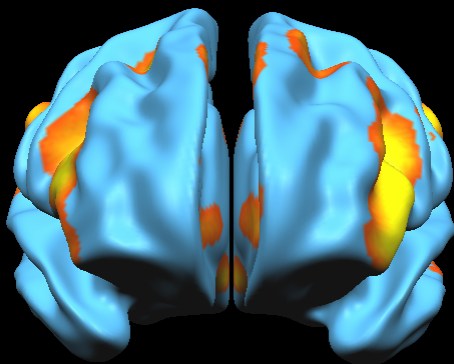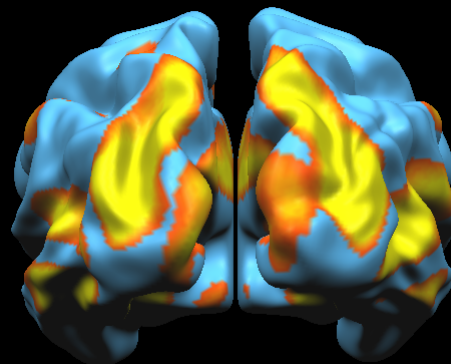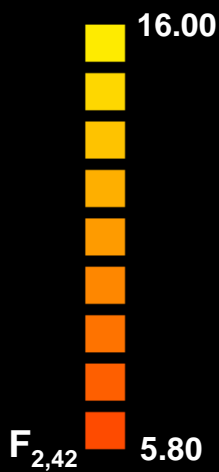

Top

Bottom

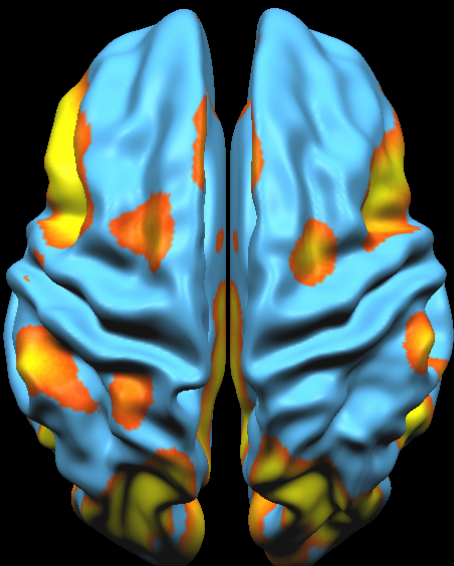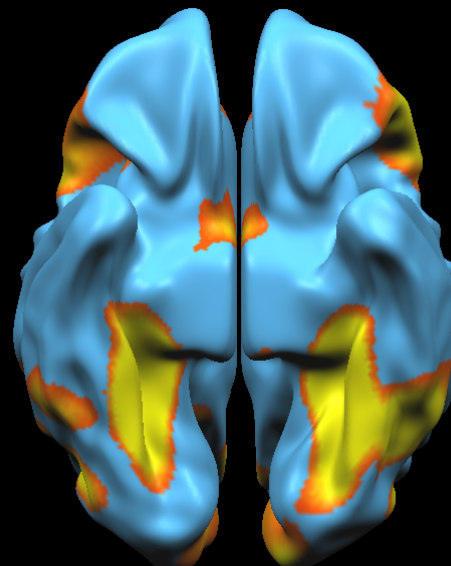

Supplement: supp_nsq079_Fig2_S2.pdf [file supp_nsq079_Fig2_S2.pdf]

Fig. S3

# Main Effect of Time

Right

Left

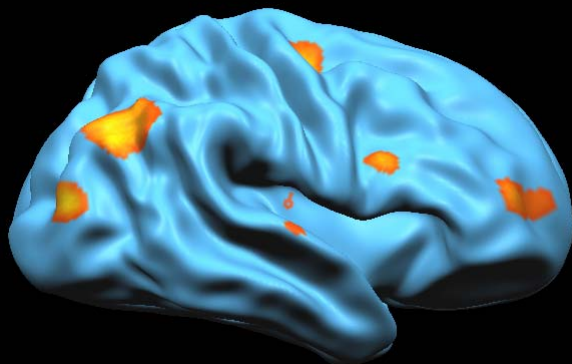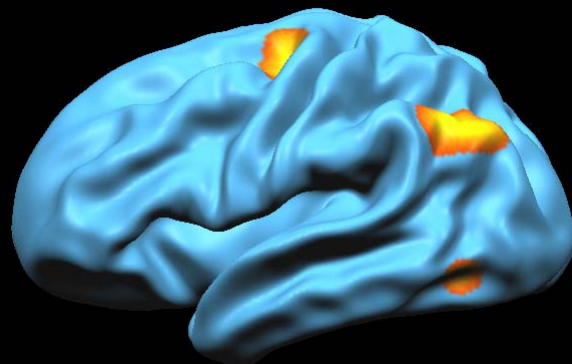

Front

Back

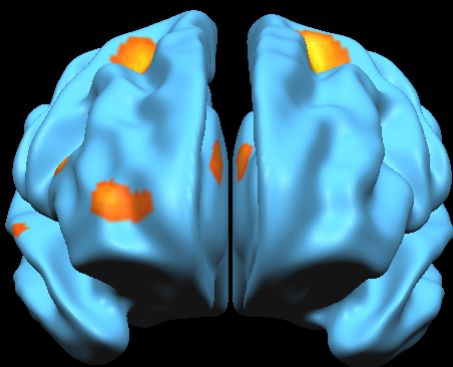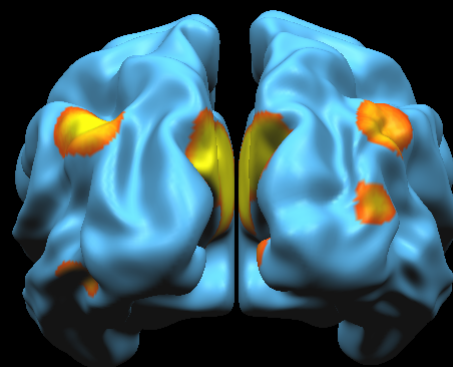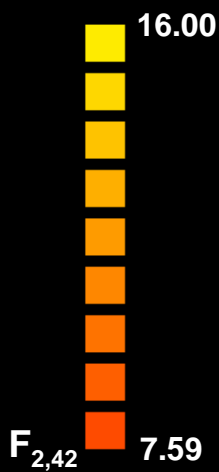

Top

Bottom

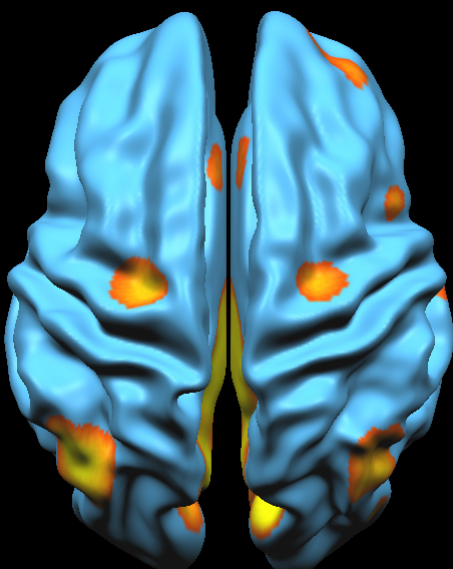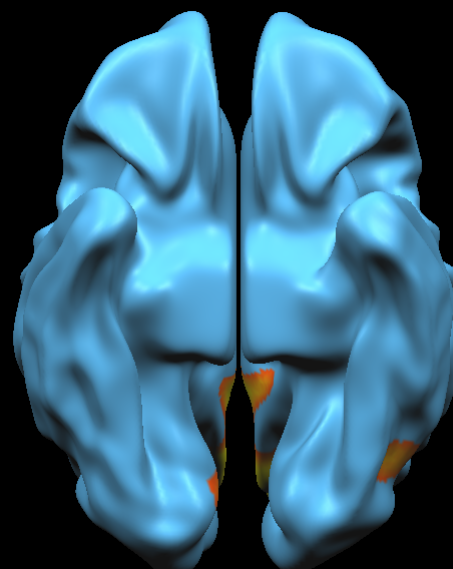

Supplement: supp_nsq079_Fig2_S3.pdf [file supp_nsq079_Fig2_S3.pdf]

**Fig. S4** Interaction Effect of Aggression x Time

**Right**

**Left**

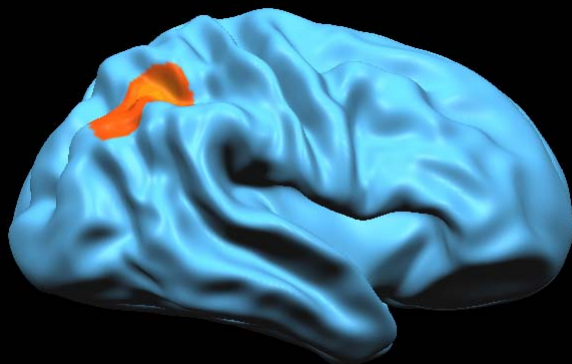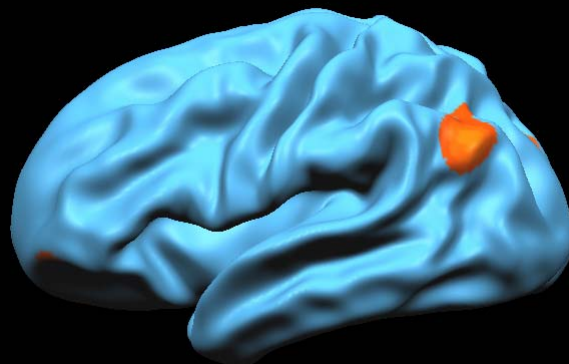

**Front**

**Back**

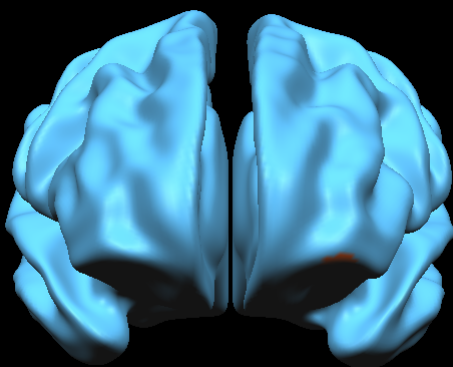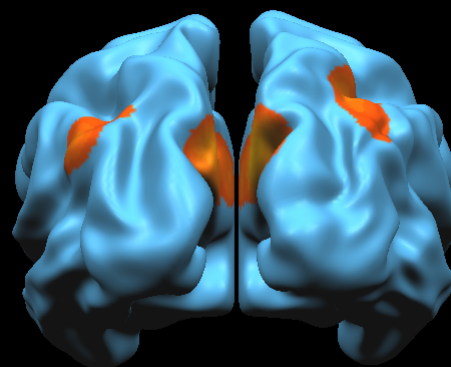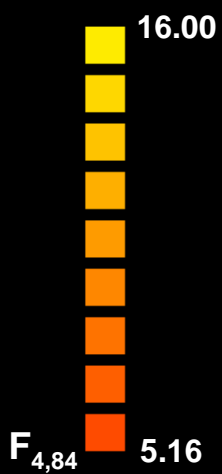

**Top**

**Bottom**

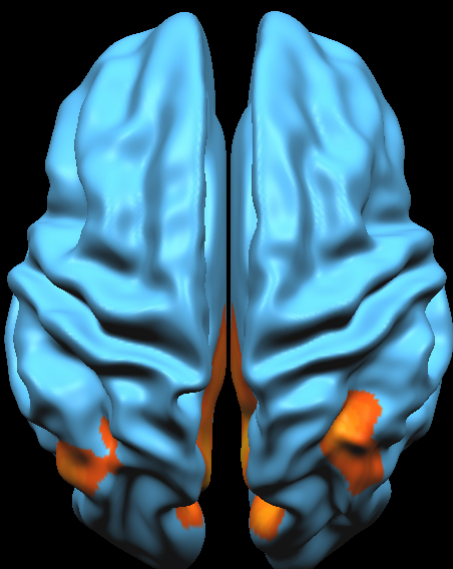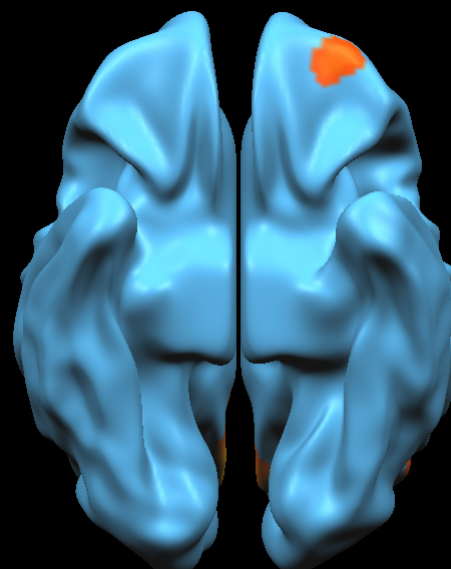

Supplement: supp_nsq079_Fig2_S4.pdf [file supp_nsq079_Fig2_S4.pdf]

Fig. S5

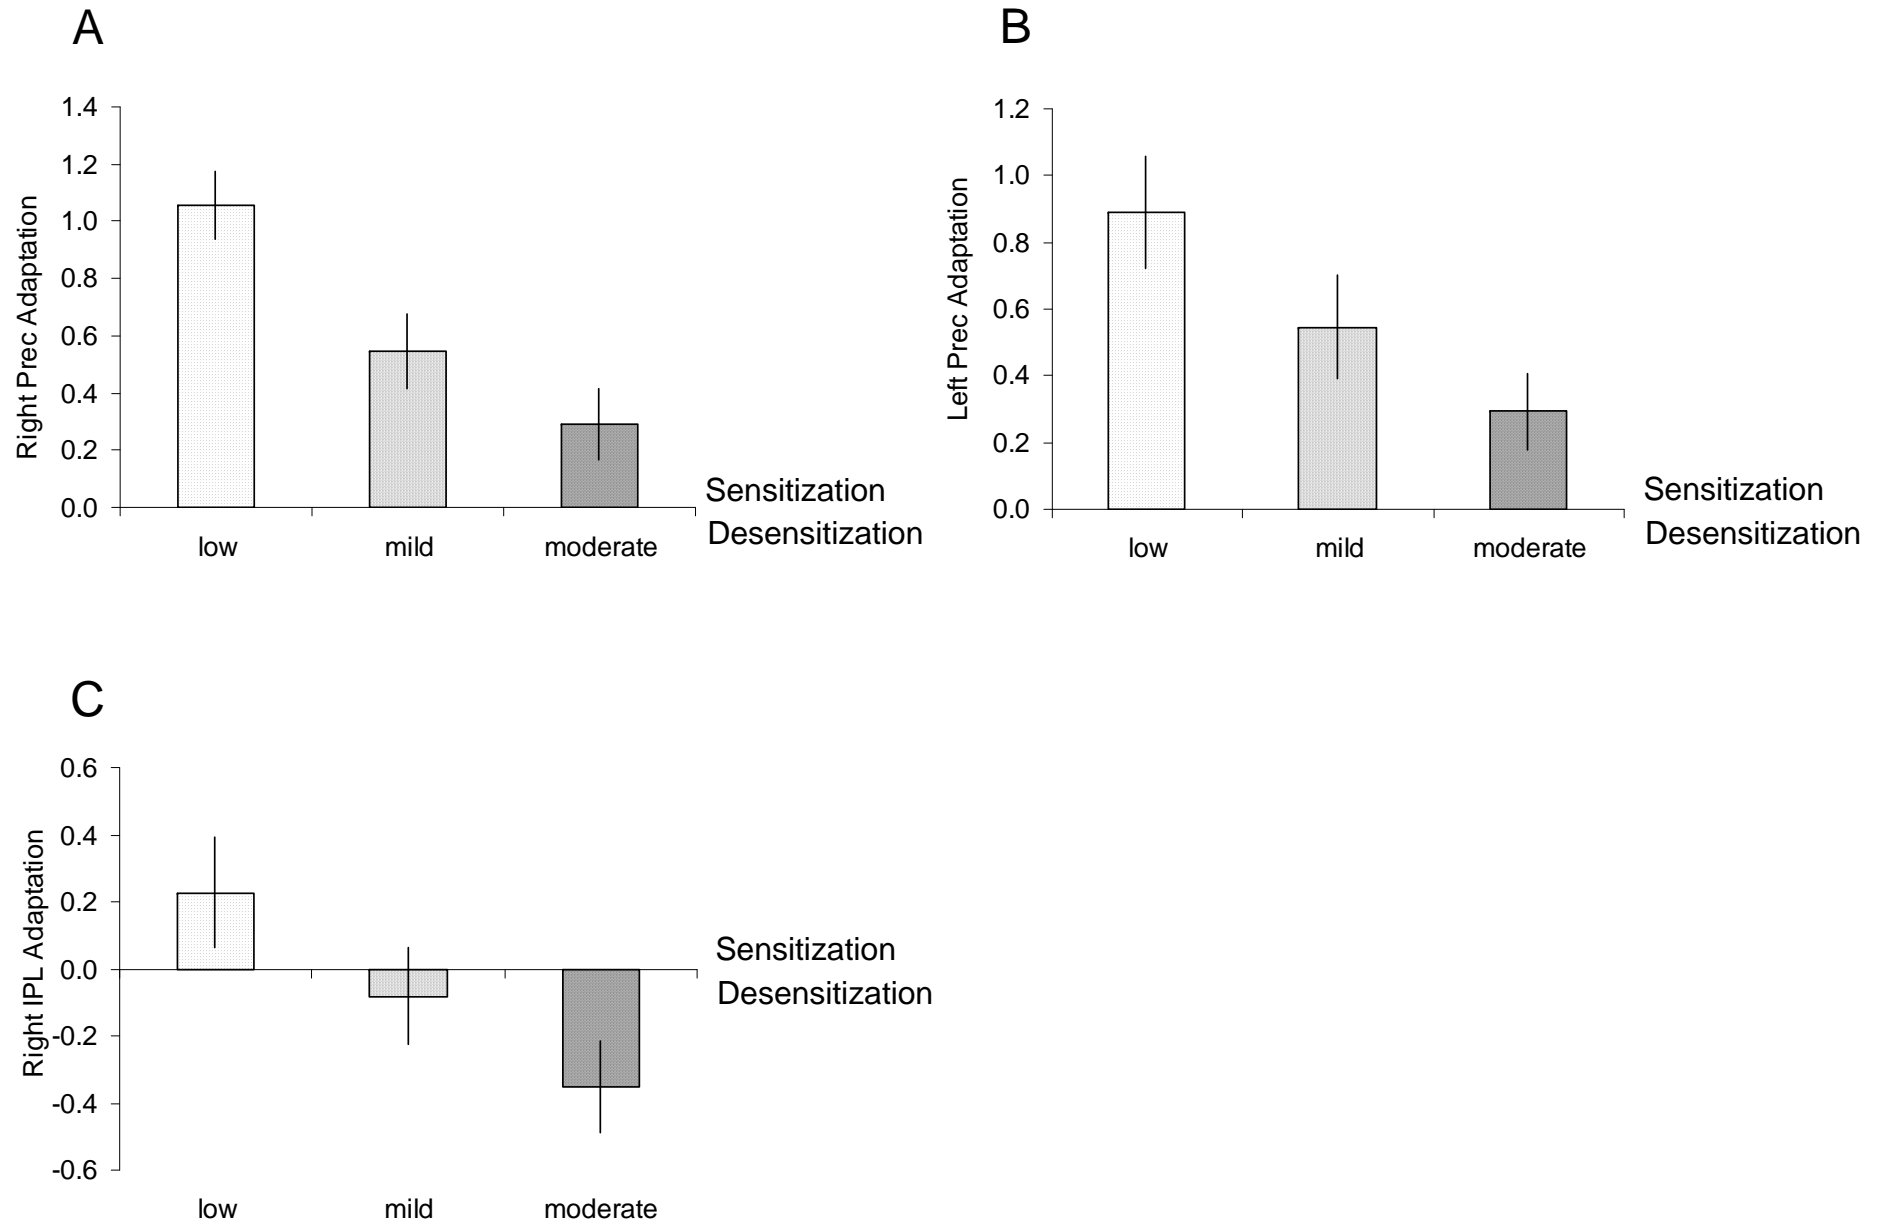

Supplement: supp_nsq079_Fig2_S5.pdf [file supp_nsq079_Fig2_S5.pdf]
